THE USE OF SCIATIC NERVE BLOCK FOR PRODUCING VASO-DILATATION OF THE LOWER EXTREMITY AND COMPARATIVE STUDY WITH PARAVERTEBRAL LUMBAR SYMPATHETIC GANGLION BLOCK \*

MILTON J. MARMER, M.D.

*Flushing, New York*

Received for publication July 31, 1951

VASODILATATION of the lower extremity may be produced by interruption of the activity of the sympathetic nerve supply to the extremity, thereby greatly increasing the circulation to the part. Normally, the peripheral vessels in the extremity are kept in a greater or lesser degree of vasoconstriction in order to help regulate systemic temperature. This condition exists likewise in patients whose circulation is impaired by peripheral vascular disease (1).

Although many methods for producing vasodilatation of the lower extremity have been in use, a review of the literature (2-74) reveals little mention of the use of peripheral sympathetic interruption by means of anesthetic block of the sciatic nerve. In 1924, Taylor and Rice (75) treated 12 patients with tropical ulcer of the lower third of the leg by open injection of the sciatic nerve. They used 5 to 10 cc. of 15 per cent alcohol and obtained vasodilatation in all cases so treated. The healing of the ulcer was hastened in every case. In 1926, Davis and Kanavel (76) reported vasodilatation following severance of the sciatic nerve.

White (77, 78), in 1930, obtained hyperemia of the foot after sciatic nerve block in 2 cases. He stated that "Procaine infiltration of the sciatic trunk, where it leaves the pelvis through the greater sciatic foramen, should produce a nearly complete vasodilatation of the arteries of the lower leg and foot. This seems to be the case, as, in two instances, I have found an increase in the peripheral surface temperature comparable to that produced by spinal anesthesia, and by posterior splanchnic injection and by ganglionectomy. . . . If further experience bears out this observation, it will be the safest way to block the sympathetic fibers to the lower leg. Sciatic block is easiest to induce and causes the minimum discomfort to the patient."

\* Presented in fulfillment of requirements for the degree of Master of Medical Science in Anesthesiology to the New York Medical College, Flower and Fifth Avenue Hospitals, New York, New York, February 15, 1951. Degree granted June 6, 1951.

Since White's observation, no other reports on sciatic nerve block used for producing vasodilatation have appeared in the American literature. Scott and Morton (79), Ruth (80), and Patterson and Stainsby (81) mentioned White's 2 cases, but no additional cases in their papers. In the foreign literature, Nowicki (82), in Poland, in 1946 reported increases in temperature following sciatic block.

This study on sciatic nerve block was undertaken because, although the principle is not new, the application thereof is uncommon.

It has been shown that the arteries to the extremities receive their nerve supply mainly from the peripheral spinal nerves (83). Vascular sympathetic fibers run to the extremities by means of the somatic spinal nerves and not by way of the arteries. All vasomotor impulses leave the spinal cord by way of the white rami. They reach the sympathetic ganglions and are relayed to the spinal nerves by way of the gray rami, thereby reaching their peripheral destination. The vascular nerves are carried in the somatic nerves and are supplied to all the vessels including the capillaries in a manner that closely corresponds to the distribution of sensory innervation of the overlying skin of the lower extremity (84).

Sympathetic nerves to the extremity are vasoconstrictor in type. Interruption of the sympathetic nerves produces changes due to release of vasoconstrictor impulses. Therapy of peripheral vascular disease is directed toward increasing blood flow by overcoming vascular spasm, especially in collateral vessels, and by forcing as much blood as possible through the damaged vessels (85). Blocking the sympathetic nerves can now be put on a sound anatomic and physiologic basis since both afferent and efferent impulses are interrupted (86).

Medical research and clinical investigation concerned with peripheral circulation depend greatly on measurements of skin temperature, particularly the changes that occur when vasomotor nerves are blocked (87). The rise in surface temperature following direct injection into nerve trunks and the amount of resulting reflex vasodilatation after release of vasoconstrictor sympathetic control can be measured (88). Differences of 0.5 F. are significant if there is a difference in both feet (89).

The sciatic nerve carries the bulk of the sympathetic nerve supply to the lower extremity (90, 91, 92). A lesion completely involving the sciatic nerve results in foot drop, loss of the Achilles reflex, loss of sensation over the entire foot except for the region of the internal malleolus and in vasomotor changes such as edema of the foot, increase in foot temperature and dry skin (93, 94, 95). The sciatic nerve is the terminal branch of the sacral plexus. It is a flat ribbonlike nerve about 12 to 14 mm. wide and 4 to 5 mm. thick at its origin (94). It becomes round as it enters the thigh. The nerve is greater in Negro than in white males, having a greater number of fasciculi. There is also an asymmetry in size according to side. In whites, the right side is

larger; in Negroes the left side is more often larger. In general, females have larger nerve fibers than males (96).

The sciatic nerve is made up of ventral and dorsal roots of the fourth and fifth lumbar and the first, second and third sacral nerves. The common level of union of these roots is at the anterior border of the great sciatic foramen below the piriformis muscle. It descends between the greater trochanter of the femur and the ischial tuberosity through the posterior surface of the thigh to the level of its lower third. There it divides into the tibial and peroneal nerves. This division may occur at any point between the sacral plexus and the popliteal notch. The sciatic nerve really consists of two nerves in one sheath, the tibial from the anterior divisions and the peroneal from the posterior divisions. After the sciatic nerve leaves the sciatic foramen it lies on the posterior surface of the ischium. It is accompanied by the small sciatic nerve and artery and is covered by the gluteus maximus muscle. It is described as being midway between the greater tuberosity and the tuber ischium. In reality, it is closer to the ischial tuberosity, depending on the position of the lower extremity. The nerve is covered by skin and fascia only at the lower border of the gluteus maximus muscle and at the entrance of the nerve into the popliteal space (94). Before it divides into its terminal divisions the sciatic nerve gives off branches to the thigh muscles and the hamstring muscles (97).

#### METHOD OF STUDY

A total of 53 nerve blocks was performed—42 sciatic nerve blocks and 11 paravertebral lumbar sympathetic ganglion blocks.

The patients, both male and female, were kept in a room where the temperature fluctuation could be maintained at a minimum. Patients remained in this room for one-half hour before the block, with both extremities uncovered and exposed to room temperature. The skin temperature of each toe, the heel and the ankle was measured and recorded before the nerve block. After nerve block, the temperature of the toes, heel and ankle of each foot was measured and recorded at approximately five minute intervals for approximately one hour.

For comparative study, in four instances paravertebral lumbar sympathetic block was performed on one side first and sciatic block on the other immediately afterward. In the other instances, the two blocks were performed at different times. In all cases, the method of nerve blocking and temperature recording was identical except in three instances (blocks 8, 9 and 25) where a different drug was used for local anesthesia.

The temperature recordings were traced on graphs, thereby representing the results of this experimental study. Bar graphs were used to represent the results of the comparative study.

## NERVE BLOCK TECHNIQS

*Sciatic Nerve Block.*—The technic used is essentially that described by Labat (98) and modified by Judovich (99). The patient lies on the side opposite to the one being injected, with the knee brought up so that the thigh is flexed on the trunk at an angle of about 135 degrees. The midpoint of the uppermost portion of the greater trochanter of the femur is located and the posterior superior iliac spine is palpated. A line is drawn connecting these two landmarks. This line is bisected and a perpendicular is drawn to about 3 cm. down from the midpoint. A skin wheal is raised at this point and a 3½ inch 22 gauge needle inserted in a downward direction until the needle point reaches the ischial spine (approximately 2 to 3 inches, or 5 to 8 cm., depending on the size of the patient). The sciatic nerve crosses over this bony point as it makes its exit from the sciatic notch, so that paresthesias may be obtained before bone is reached. Injection of procaine is made when paresthesia is obtained. The patient is forewarned that he will experience the paresthesia, after which numbness of the leg will ensue for about forty-five minutes.

Anesthetic solutions: (1) 10 cc. of 1 per cent procaine (5 cc. of 2 per cent procaine hydrochloride diluted with 5 cc. of dolamine solution); (2) 10 cc. of 1.5 per cent metycaine. This solution was used in three instances in which no response was obtained with procaine.

*Paravertebral Lumbar Sympathetic Nerve Block.*—The technic used is essentially the one described by Lundy (100), Judovich (99) and White (101). The patient lies prone on the table with a pillow under the abdomen so that the lumbar vertebrae will be elevated and their spinous processes easily palpated. The spinous processes of the lumbar vertebrae are located and wheals raised 3.5 cm. laterally. A 3½ inch 22 gauge needle is passed directly downward to the transverse process. The needle is then partially withdrawn and reinserted cephalad so as to clear the transverse process. The needle is inserted for a distance of 2 to 3 cm. beneath the transverse process. Contact is made with the lateral border of the vertebral body where the sympathetic ganglion is located and, after careful aspiration, 5 cc. of 2 per cent procaine is injected in each segment desired. Only two or three ganglions were injected. The second lumbar sympathetic ganglion was always injected since it has been shown that the only lumbar ganglion which is constant in position and connections is the second lumbar ganglion (102).

Temperature readings were obtained with the McKesson dermalor. This instrument employs the use of a resistance thermometer, the principle of which is that certain metals have a high coefficient of change of resistance with temperature. If a coil of such wire is held against the skin, the skin temperature can be deduced from the electrical resistance of the coil at that moment. The difference between resist-

ance thermometer and thermocouple measurements is that in the thermocouple the only energy available is the thermo-electric electromotive force at the junction, whereas in the resistance thermometer the energy comes from a battery and the temperature being measured controls this (87).

All temperature readings were in degrees Fahrenheit.

### RESULTS

The results of this experimental study were charted. Figures 1 and 2 are representative examples of these graphs. These graphs are uniform in that rise in temperature is plotted against time elapsed since performance of the nerve block. The straight line represents the leg or lumbar ganglions which have been injected; the broken line represents the control side.

In those instances in which sciatic nerve block has been performed on one side and paravertebral block on the other, the results of sciatic block are represented by a straight line and the results of the paravertebral block by a broken line.

The bar graphs, of which figure 3 is an example, representing the composite results of the comparative study between sciatic nerve block and lumbar sympathetic ganglion block, were plotted so that the temperature before nerve block and the maximal temperature reached after nerve block are compared. These results were readily visible as well as the temperature of the control side which accompanies them. In some cases the temperature of the control leg was decreased.

### COMMENT

Anesthetic block of the sciatic nerve results in vasodilatation of the vessels of the foot. This is evident by the rise in surface temperature which follows nerve block. Temperature rises varied from 0.5 F. to 22 F. The more complete the block, the greater the degree of vasodilatation. The amount of vasodilatation is, of course, dependent upon the amount of vasoconstrictor influence which has been eliminated. Likewise, the amount of vasodilatation is also dependent upon the elasticity of the vessel walls. Suffice it to say that total sympathetic paralysis of the foot will be obtained with sciatic nerve block. Following sciatic nerve block, the foot is warm and dry and the superficial vessels are distended. These are the criteria of interruption of the sympathetic supply to the extremity. Rise in temperature is noted within ten minutes after sciatic nerve block, and reaches a maximum within twenty to thirty minutes. The increase in temperature is sustained for at least one hour after nerve block.

Patients experience no discomfort from the motor paralysis which occurs with the block, nor do they mind the sensory anesthesia of the extremity which accompanies it. They seem to feel at ease and enjoy

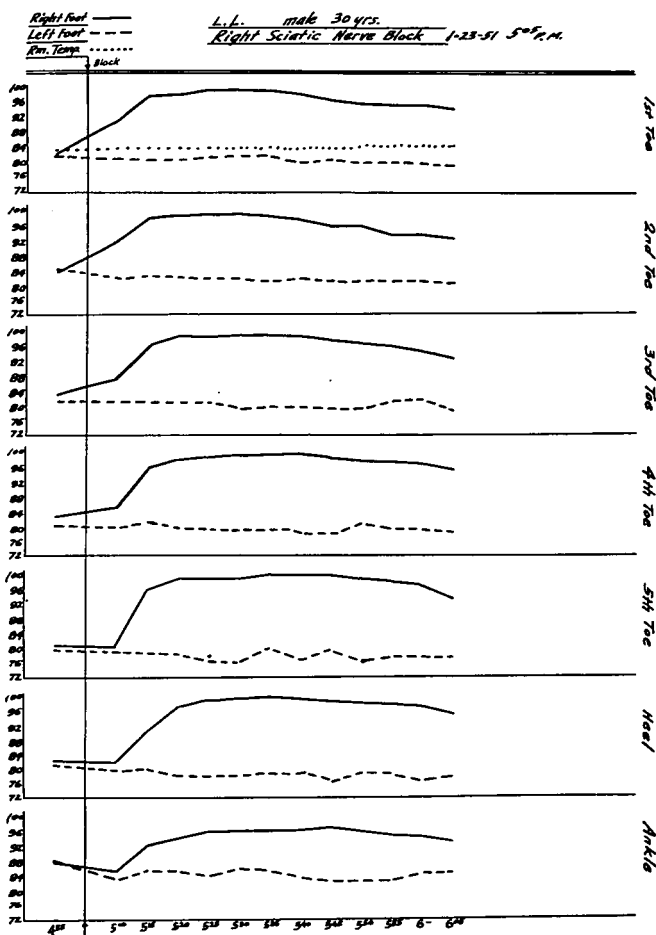

FIG. 1.

the increased warmth of the foot. Both motor loss and sensory loss last only about forty-five minutes after block. The patients have a sense of well-being after the anesthesia wears off. Two patients with intermittent claudication were treated by sciatic nerve block and ob-

tained relief from symptoms. Ochsner (103) believed that relief of intermittent claudication proves that there is an increase in blood flow to the muscles. Barcroft and Edholm (104) have also shown that blood flow in muscles is more than doubled by release of sympathetic tone.

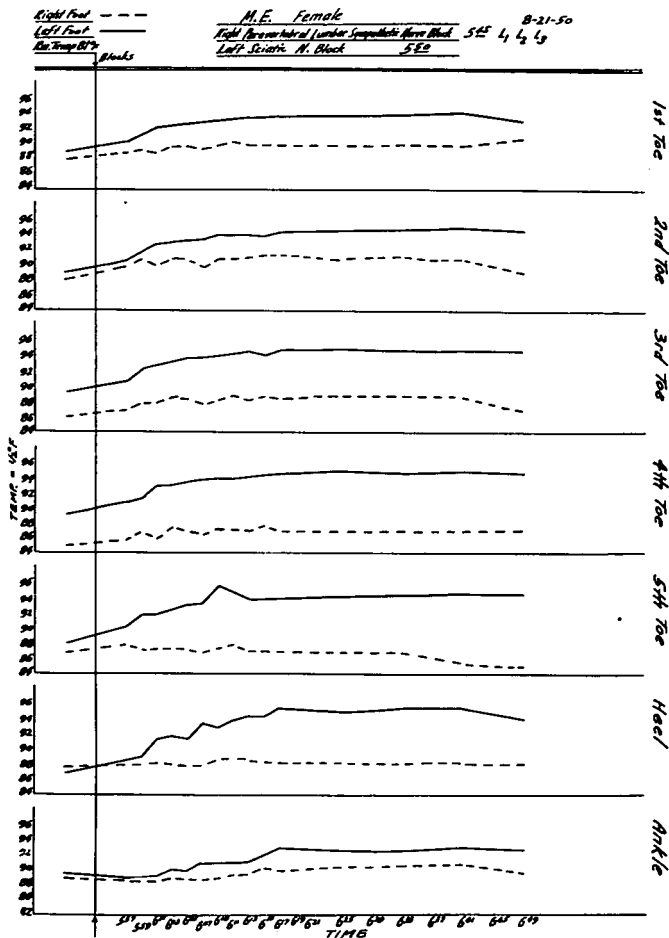

FIG. 2.

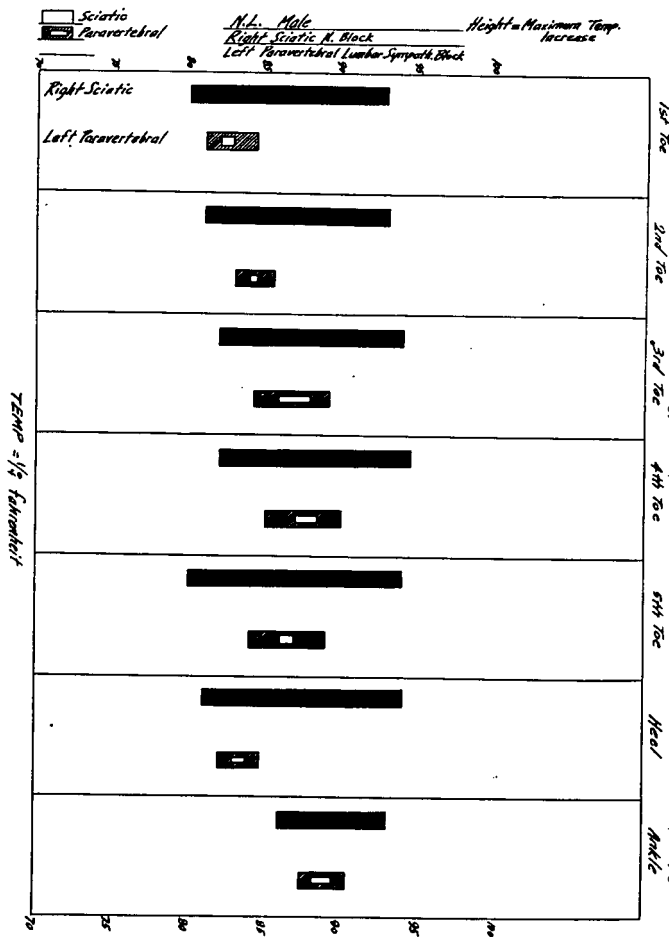

FIG. 3.

Sciatic nerve block is easy to perform and is without reported complications. No complications occurred in this series. Judovich and Bates (99) have reported more than 2000 sciatic nerve infiltrations without harm to the nerve supply.



Comparison between sciatic nerve block and paravertebral lumbar sympathetic ganglion block shows that sciatic nerve block is as effective as lumbar sympathetic block in increasing the temperature of the foot. The amount of vasodilatation obtained is the same or sometimes greater with sciatic nerve block than with lumbar sympathetic block. In the cases in which sympathetic block was performed on one side first and then sciatic block performed on the other, the rise in temperature of the foot was more rapid, more sustained and greater with sciatic block than with lumbar sympathetic ganglion block.

The lumbar sympathetic blocks were painful to the patients no matter how carefully the procedure was carried out. Back pain and soreness persisted for several days after block. One complication was encountered in this series, although several complications have been reported in the literature.

The complication which occurred in this series was cerebrovascular accident following lumbar sympathetic ganglion block. Case 36 P, a 63 year old white man, became completely disoriented, and athetoid movements and incoherent speech developed one-half hour after block. Right hemiplegia followed soon afterward. De Sousa-Pereira (105) reported a similar cerebrovascular accident. Other complications following lumbar sympathetic block which have been reported are: paraplegia (106); vertebral osteomyelitis (106); subarachnoid tap (107); acute aseptic meningitis (108), neuritis (109-111) and death (112).

In many of the cases studied, another important phenomenon was demonstrated. This has been called "hematometakinesia" by Ochsner, DeBaKey (113) and their associates. This is the "borrowing-lending" hemodynamic phenomenon. This phenomenon explains the decrease in temperature of the opposite leg when vasodilatation is produced on the other side. As the temperature of the one leg increases, that of the other leg decreases. When vasodilatation is present, the blood comes from the vascular bed of the body. It is accomplished by adjustment of the vascular bed and without change in total volume. This is an important factor in therapy of peripheral vascular disease.

### CONCLUSIONS

Sciatic nerve block produces a maximal degree of vasodilatation of the foot which cannot be exceeded and which is seldom equaled by paravertebral lumbar sympathetic ganglion block.

Sciatic nerve block offers a means of determining the degree of vasoconstrictor tone and the extent of vasodilatation which can be produced by interruption of the sympathetic pathways.

Sciatic nerve block is easy to perform and causes little discomfort to the patient. No complications occurred in this study and none have been reported in the literature.

Intermittent claudication of the foot may be relieved by sciatic nerve block.

Lumbar sympathetic ganglion block is more difficult to perform, less accurate and more painful to the patient. One complication occurred in this study and many complications have been reported in the literature.

#### ADDENDUM

Since presentation of this paper, another complication of paravertebral lumbar sympathetic block has been reported, namely, retroperitoneal hemorrhage, by Learned, L. O., and Cahoon, R. F., in *Anesthesiology* 12: 391-396 (May) 1951.

MILTON J. MARMER, M.D.,  
35-16 190th Street,  
Flushing 58, N. Y.

#### REFERENCES

1. Silbert, S.: Principles of Treatment in Peripheral Vascular Disease, *J. Mt. Sinai Hosp.* 7: 503-515 (Jan.-Feb.) 1941.
2. White, J. C.: Procaine Block of Sympathetic Nerves in Study of Intractable Pain and Circulatory Disorders, *S. Clin. North America* 27: 1263-1280 (Oct.) 1947.
3. Nicholson, M. J.: Symposium on Postoperative Complications—Prevention, Recognition and Treatment; Treatment of Thrombophlebitis by Paravertebral Sympathetic Block, *S. Clin. North America* 24: 538-550 (June) 1944.
4. Nicholson, M. J.: Treatment of Thrombophlebitis by Paravertebral Block, *Anesth. & Analg.* 21: 137-150 (May-June) 1942.
5. Silbert, S.: New Method of Treatment for Thromboangiitis Obliterans, *J.A.M.A.* 79: 1765 (1922).
6. Skillern, P. G.: Relief of Painful Thigh Stump and Sciatica, *J.A.M.A.* 128: 514-515 (Oct. 21) 1944.
7. Schumacker, H. B.: Surgical Physiology of Peripheral Vascular Disorders, *S. Clin. North America* 29: 1683-1697 (1949).
8. Bieter, R. N., and Seammon, R. E.: Experimental and Quantitative Analysis of Local Anesthesia of Frog's Isolated Sciatic Nerve, *Proc. Soc. Exper. Biol. & Med.* 36: 198-201 (March) 1937.
9. Abbott, W. D.: Relief of Intractable Pain by Nerve Block and Section, *J. Missouri M. A.* 29: 379-381 (Aug.) 1932.
10. Sunderland, S.: Blood Supply of Sciatic Nerve and Its Popliteal Divisions in Man, *Arch. Neurol. & Psychiat.* 54: 283-289 (Oct.) 1945.
11. Scott, W. J. M., and Morton, J. J.: Differentiation of Peripheral Arterial Spasm and Occlusion in Ambulatory Patients, *J.A.M.A.* 97: 1212 (Oct. 24) 1931.
12. Brown, G. E., Jr., and Allen, E. V.: Continuous Vasodilatation in Extremities Produced Reflexly; Physiologic Studies on Temperature of Skin and on Volume Flow of Blood, *Am. Heart J.* 21: 564-573 (May) 1941.
13. Freeman, N. E., and Montgomery, H.: Lumbar Sympathectomy in Treatment of Intermittent Claudication; Selection of Cases by Claudication Test with Lumbar Paravertebral Procaine Injection, *Am. Heart J.* 23: 224-242 (Feb.) 1942.
14. McLaughlin, E. F.: Simple Method for Repeated Blocking of Sympathetic Ganglia in Ambulatory Patients, *M. Rec.* 155: 27-29 (Jan. 7) 1942.
15. McPheeters, H. O., and Alexander, H. A.: Lumbar Sympathetic Block and That Postphlebotic Leg, *Minnesota Med.* 29: 43-45 (Jan.) 1946.
16. Luke, J. C.: Value of Lumbar Sympathetic Procaine Block, *Canad. M. A. J.* 55: 11-15 (July) 1946.
17. Mahorner, H.: Sympathetic Nerve Blocks in Rehabilitation of Injured Extremity; Report of Cases and Discussion of Causalgia, *New Orleans M. & S. J.* 94: 426-432 (March) 1942.
18. Gootnick, A.; Saland, G.; Klein, C., and Zurrow, H.: Studies on Vasodilatation Tests in Peripheral Vascular Disease, *J. Lab. & Clin. Med.* 27: 878-882 (April) 1942.
19. Papper, E. M., and Imler, A. E.: Use of Phlebography and Lumbar Sympathetic Block in Diagnosis of Venospasm of Lower Extremities; Preliminary Report, *Surgery* 15: 402-412 (March) 1944. Correction 15: 865 (May) 1944.

20. Ochsner, A.: Use of Vasodilatation in Treatment of Venous Thrombosis, *Surg., Gynec. & Obst.* **84**: 659-664 (April) 1947.
21. Tyson, M. D., and Gaynor, J. S.: Interruption of Sympathetic Nervous System in Relation to Trauma, *Surgery* **19**: 167-176 (Feb.) 1946.
22. Grimson, K. S.: Sympathectomy and Circulation—Anatomic and Physiologic Considerations and Early and Late Limitations, *Surgery* **19**: 277-298 (Feb.) 1946.
23. Morton, J. J., and Scott, W. J. M.: Studies on Activity of Lumbar Sympathetic Nervous System, *Ann. Surg.* **92**: 919-930 (Nov.) 1930.
24. de Takats, G., and Miller, D. S.: Post-Traumatic Dystrophy of Extremities; Chronic Vasodilator Mechanism, *Arch. Surg.* **46**: 469-475 (April) 1943.
25. Aycock, T. B., and Hendrick, J. W.: Sympathectomy for Certain Forms of Peripheral Vascular Disease, *Texas State J. Med.* **42**: 468-474 (Dec.) 1946.
26. Sarnoff, S. J., and Arrowood, J. G.: Differential Spinal Block; Preliminary Report, *Surgery* **20**: 150-159 (July) 1946.
27. Flothow, P. G.: Diagnostic and Therapeutic Injections of Sympathetic Nerves, *Am. J. Surg.* **14**: 591-604 (Dec.) 1931.
28. Gage, I. M.: Mycotic Aneurysm of Common Iliac Artery; Sympathetic Ganglion Block as Aid in Development of Collateral Circulation in Arterial Aneurysm of Peripheral Arteries; Report of Case, *Am. J. Surg.* **24**: 667-710 (June) 1934.
29. Hendrick, J. W., and Aycock, T. B.: Sympathectomy for Peripheral Vascular Disease, *South. Med. J.* **40**: 219-228 (March) 1947.
30. DeCourcy, J. L.: Lumbar Anesthesia by Controllable Method: Recapitulation of Pitkin's Technique as Employed in Series of 500 Cases at DeCourcy Clinic, *Anesth. & Analg.* **10**: 215-218 (Sept.-Oct.) 1931.
31. Ochsner, A., and DeBakey, M.: Thrombophlebitis and phlebothrombosis; C. Jeff Miller Lecture, *South. Surgeon* **8**: 269-290 (Aug.) 1939.
32. Freeman, N. E.; Leeds, F. H., and Gardner, R. E.: Sympathectomy for Obliterative Arterial Disease; Indications and Contraindications, *Ann. Surg.* **128**: 873-894 (Dec.) 1947.
33. Ochsner, A., and DeBakey, M. E.: Peripheral Vascular Disease; Classification and Therapeutics Based Upon Physio-Pathologic Alterations, *Internat. Clin.* **3**: 1-32 (Sept.) 1939.
34. Ochsner, A., and DeBakey, M. E.: Peripheral Vascular Disease; Critical Survey of Its Conservative and Radical Treatment, *Surg., Gynec. & Obst.* **70**: 1058-1072 (June) 1940.
35. Friedlander, M.; Silbert, S., and Bierman, W.: Regulation of Circulation in Skin and Muscles of Lower Extremities, *Am. J. M. Sc.* **199**: 657-668 (May) 1940.
36. Morton, J. J., and Scott, W. J. M.: Measurement of Sympathetic Vasoconstrictor Activity in Lower Extremities, *J. Clin. Investigation* **9**: 235-246 (Oct. 20) 1930.
37. Brill, S., and Lawrence, L. B.: Changes in Temperature of Lower Extremities Following Induction of Spinal Anesthesia, *Proc. Soc. Exper. Biol. & Med.* **27**: 728-737 (May) 1930.
38. Danhorst, A. C.: Sympathectomy in Occlusive Vascular Disease, *Practitioner* **164**: 497-501 (June) 1950.
39. Green, H. D.; Perkins, W., and Abernethy, J.: Evaluation of Severity of Organic Vascular Diseases and Comparison of Effectiveness of Various Procedures, *Circulation* **1**: 1277-1292 (June) 1950.
40. Pratt, G. H.: Present Status of Sympathectomy in Treatment of Vascular Disease, *Angiology* **1**: 9-19 (Feb.) 1950.
41. Hollis, W. S.; Holourbek, J. E., and Chanton, E. F.: Comparative Effects of Tetraethylammonium Chloride and Lumbar Sympathetic Block on Blood Flow in Lower Extremities in Peripheral Vascular Diseases; Report of 3 Cases, *South. M. J.* **41**: 1076-1080 (Dec.) 1948.
42. DeBakey, M. E.: Discussion of Paper by Colby et al. on Peripheral Vascular Disease, *Ann. Surg.* **125**: 754-755, 1947.
43. Harpuder, K.: Peripheral Vascular Reactions after Sympathectomy, *Arch. Phys. Med.* **26**: 149-153 (March) 1945.
44. Allen, A. W.: Present Evaluation of Prophylaxis and Treatment of Venous Thrombosis, *Surgery* **26**: 1-7 (July) 1949.
45. DeBakey, M. E., and Ochsner, A.: Phlegmasia Cerulea Dolens and Gangrene Associated with Thrombophlebitis; Case Reports and Review of Literature, *Surgery* **26**: 16-29 (July) 1949.

46. Coller, F. A.; Campbell, K. N.; Harris, B. M., and Berry, R. E. L.: Early Results of Sympathectomy in Far-Advanced Arteriosclerotic Peripheral Vascular Disease, *Surgery* **26**: 30-40 (July) 1949.
47. Hermann, L. G., and Buchman, J. A.: Complications Resulting from Injuries to Major Arteries, *Surgery* **26**: 59-66 (July) 1939.
48. Veal, J. R., and Shadid, J. N.: Hyperhidrosis; Observations on Study of 61 Cases, *Surgery* **26**: 89-98 (July) 1949.
49. Gerber, L.; McCune, W. S., and Eastman, W.: Lumbar Sympathectomy for Arteriosclerotic Gangrene, *Arch. Surg.* **59**: 1234-1243 (Dec.) 1949.
50. Bone, J. R.: Regional Nerve Block Anesthesia, *Anesthesiology* **6**: 612-616 (Nov.) 1945.
51. Kolodny, A.: Clinical Manifestations of Sympathetic Reflex Arc, *Am. J. Surg.* **78**: 86-89 (July) 1949.
52. Smithy, H. G.: General Surgical Significance of Vasoconstriction, *J. South Carolina M. A.* **41**: 57-61 (March) 1945.
53. deTakats, G.: Indications for Lumbar Sympathectomy, *Illinois M. J.* **92**: 349-351 (Dec.) 1947.
54. Newell, E. T.: Surgery of Sympathetic Nervous System, *J. Tennessee M. A.* **39**: 287-292 (Aug.) 1946.
55. Freeman, N. E.: Surgical Treatment of Peripheral Arterial Disease, *Pennsylvania M. J.* **44**: 986-989 (May) 1941.
56. Odom, C. B.: Recent Advances in Block Anesthesia, *South. M. J.* **31**: 778-783 (July) 1938.
57. Ochsner, A., and DeBakey, M. E.: Role of Vasospasm in Thrombophlebitis and Its Treatment by Novocain Block of Sympathetics, *Tri-State M. J.* **13**: 2654-2657 (Jan.) 1941.
58. Yater, W. M.; Duryie, A. W.; Freeman, N. E., and Veal, J. R.: Panel Discussion on Peripheral Vascular Disease, *M. Ann. District of Columbia* **11**: 98-103 (March) 1942.
59. Dickens, R. D., and Richmond, J. B.: Lumbar Sympathetic Block in Premature Infant, *J.A.M.A.* **126**: 1149-1150 (Dec. 30) 1944.
60. Flothow, P. G.: Injection of Sympathetic Nervous System, *California & West Med.* **44**: 182-186 (March) 1936.
61. Kirtley, J. A., Jr.: Experiences with Sympathectomy in Peripheral Lesions, *Ann. Surg.* **122**: 29-38 (July) 1945.
62. Mason, J. M., III, and Giddings, W. P.: Experience with Lumbar Sympathetic Ganglionectomy for Wounds of Major Blood Vessels of Lower Extremity, *Surg., Gynec., & Obst.* **81**: 169-176 (Aug.) 1945.
63. Schumacker, H. B., and Abramson, D. E.: Post Traumatic Vasomotor Disorders, *Surg., Gynec. & Obst.* **88**: 417-434 (April) 1949.
64. Al Akl, F. M.; Singer, A., and Roesch, C. B.: Peripheral Vascular Surgery, *Am. J. Surg.* **55**: 520-526 (March) 1942.
65. Reichert, F. L.: Intermittent Claudication Without Gangrene, Controlled by Sympathetic Nerve Block, *Ann. Surg.* **97**: 503-507 (April) 1933.
66. Silbert, S.: Evaluation of Results in Treatment of Peripheral Circulatory Disease, *Am. Heart J.* **15**: 265-270 (March) 1938.
67. Anderson, Ruth M., et al.: Diagnostic and Therapeutic Nerve Blocks, *Current Res. in Anesth. & Analg.* **29**: 315-327 (Nov.) 1950.
68. Siddons, A. H. M.: Sympathetic Block in Vascular Injuries, *Lancet* **2**: 77 (July 21) 1945.
69. Smithwick, R. H.: Medical Progress; Surgery of Sympathetic Nervous System; Role of Vasospasm in Acute Lesions Involving Major Peripheral Vessels, *New England J. Med.* **224**: 329-332 (Feb. 20) 1941.
70. Smithwick, R. H.: Medical Progress; Surgery of Autonomic Nervous System; Method of Study, with Particular Reference to Interpretation of Clinical Results, *New England J. Med.* **226**: 605-612 (April 9) 1942.
71. Renka, J. E., and Kamsler, P. M.: Continuous Lumbar Sympathetic Block, *Anesthesiology* **10**: 92-100 (Jan.) 1949.
72. Popper, J. L.: Technique of Lumbar Sympathectomy, *S. Clin. North America* **29**: 667-671 (June) 1949.
73. deTakats, G.: Technique of Lumbar Sympathectomy, *S. Clin. North America* **26**: 56-69 (Feb.) 1946.
74. Mandl, Felix: Paravertebral Block, New York, Grune & Stratton, Inc., 1947.
75. Taylor, K. P. A., and Rice, J. B.: Injection of Sciatic Nerve as Substitute for Femoral Periarterial Sympathectomy, *J.A.M.A.* **86**: 191-192 (Jan. 16) 1926.

76. Davis, L., and Kanavel, A. B.: Sympathectomy in Raynaud's Disease; Erythromelalgia and Other Vascular Diseases of the Extremities, *Surg., Gynec., & Obst.* **42**: 729-742 (June) 1926.
77. White, J. C.: Diagnostic Blocking of Sympathetic Nerves to Extremities with Procaine; Test to Evaluate Benefit of Sympathetic Ganglionectomy, *J.A.M.A.* **94**: 1382-1388 (May 3) 1930.
78. White, J. C.: Diagnostic Novocaine Block of Sensory and Sympathetic Nerves; Method of Estimating Results Which Can Be Obtained by Their Permanent Interruption, *Am. J. Surg.* **9**: 264-277 (Aug.) 1930.
79. Scott, W. J. M., and Morton, J. J.: Differentiation of Peripheral Arterial Spasm and Occlusion in Ambulatory Patients, *J.A.M.A.* **97**: 1212-1215 (Oct. 24) 1931.
80. Ruth, H. S.: Diagnostic, Prognostic and Therapeutic Nerve Blocks, *J.A.M.A.* **103**: 419-425 (Feb. 10) 1934.
81. Patterson, R. H., and Stainsby, W. J.: Therapeutic Effects Following Interruption of Sympathetic Nerves; Report on Alcohol Blocks in Certain Arthritic and Vascular Cases, *Ann. Surg.* **103**: 514-534 (April) 1936.
82. Nowicki, S. T.: Examination of Blood Supply of Lower Extremity by Block of Sciatic Nerve, *Polski tygodnik lek* **1**: 495-499 (1946).
83. Potts, L. W.: Distribution of Nerves to the Arteries of the Legs, *Anat. Anz.* **47**: 138-143 (1915).
84. Abramson, D. M.: Vascular Responses in Extremities of Man in Health and Disease, Univ. Chicago Press, 1945.
85. Duryee, A. W.: Physiologic Background of Peripheral Vascular Disease, *M. Ann. District of Columbia* **11**: 93-94 (March) 1942.
86. Threadgill, F. D.: Afferent Conduction via the Sympathetic Ganglia Innervating the Extremities, *Surgery* **21**: 569-574 (April) 1947.
87. Potter, Van B., editor: *Methods in Medical Research*, Chicago, Year Book Publishers, Inc., 1948, vol. 1.
88. Abbott, W. D.: Surgical Aspects of Autonomic Nervous System, *Ann. Surg.* **97**: 494-502 (April) 1933.
89. Yater, W. M.: Diseases of Arteries Affecting the Extremities, *Med. Ann. District of Columbia* **11**: 83-89 (March) 1942.
90. Gask, George E., and Ross, J. Patterson: *The Surgery of the Sympathetic Nervous System*, ed. 2, London, Wood; Bailliere, Tindall & Cox, 1937.
91. Engel, D.: Sympathetic Block, Proposed Therapy in Traumatic Shock, *Brit. M. J.* **2**: 434-435 (Sept. 30) 1944.
92. Gask, G. E.: Surgery of Sympathetic Nervous System, *Brit. J. Surg.* **21**: 113-130 (July) 1933.
93. Favill, John: *Outline of the Spinal Nerves*, Springfield, Ill., Charles C Thomas, 1946, p. 56.
94. Pollock, L. J., and Davis, L.: Peripheral Nerve Injuries, *Am. J. Surg.* **16**: 151-206 (Oct.) 1932.
95. Macewen, J.: Case of Complete Section of Both Sciatic Nerves, *Brit. M. J.* **2**: 878-879 (Nov. 12) 1932.
96. Ide, H.: On Size of Sciatic Nerve, *J. Comp. Neurol.* **51**: 457-487; 489-521 (Dec.) 1930.
97. Bosworth, D. M.: Posterior Approach to Femur, *J. Bone & Joint Surg.* **26**: 687-690 (Oct.) 1944.
98. Labat, G.: *Regional Anesthesia*, Philadelphia, W. B. Saunders Co., 1922.
99. Judovich, B., and Bates, W.: *Pain Syndromes*, Philadelphia, F. A. Davis Co., 1949.
100. Lundy, John S.: *Clinical Anesthesia*, Philadelphia, W. B. Saunders Co., 1942.
101. White, J. C., and Smithwick, R.: *The Autonomic Nervous System*, New York, The Macmillan Co., 1945.
102. Atlas, L. N.: Sympathetic Denervation Limited to Blood Vessels of Leg and Foot, *Ann. Surg.* **116**: 476-479 (Sept.) 1942.
103. Ochsner, A.: Statement Made During Delivery of Paper "Indications for Sympathetic Nervous System Block" (Nov. 2) 1950, Congress of Anesthetists, Miami, Fla. Unpublished.
104. Barcroft, H., and Edholm, O. G.: Sympathetic Control of Blood-Vessels of Human Skeletal Muscle, *Lancet* **2**: 513-515 (Oct. 12) 1946.
105. deSousa Pereira, A.: Blocking of Splanchnic Nerves and First Lumbar Sympathetic Ganglion; Technique, Accidents and Clinical Indications, *Arch. Surg.* **53**: 32-76 (July) 1946.

106. Browder, J. Personal Communication.
107. White, J. C.: Technique of Paravertebral Alcohol Injection; Methods and Safeguards in Its Use in Treatment of Angina Pectoris, Surg., Gynec., & Obst. 71: 334-343 (Sept.) 1940.
108. Adelman, M. H., and Irwin, C. I.: Acute Aseptic Meningitis Following Paravertebral Lumbar Sympathetic Blocks, Anesthesiology 7: 422-425 (July) 1946.
109. White, J. C.: Angina Pectoris; Treatment by Paravertebral Alcohol Injection or Operation Based on Newer Concepts of Cardiac Innervation, Am. J. Surg. 9: 98-105 (July) 1930.
110. Swetlow, G. I.: Angina Pectoris; Paravertebral Alcohol Block for Relief of Pain, Am. J. Surg. 9: 88-97 (July) 1930.
111. Saland, G., and Klein, C.: Evaluation of Alcohol Paravertebral Block in Peripheral Vascular Disease, Am. J. M. Sc. 207: 749-753 (June) 1944.
112. Bradsher, J. T.: Complications Following Paravertebral Lumbar Sympathetic Block with Nupercaine in Oil, New England J. Med. 240: 291-293 (Feb. 24) 1949.
113. DeBaKey, M. E.; Burch, G.; Ray, T., and Ochsner, A.: Borrowing-Lending Hemodynamic Phenomenon (Hemometakinesia) and Its Therapeutic Application in Peripheral Vascular Disturbances, Ann. Surg. 128: 850-865 (Dec.) 1947.

(Continued from page 206)

SCIENTIFIC SESSION, Regency Room, Hotel Sherman

“Reactions to Local Anesthetic Drugs,”

John E. Steinhaus, M.D., Madison.

“Blood Transfusion Problems,”

Albert M. Wolf, M.D., Chicago.

“Controlled Hypotension,”

Max Sadove, M.D.

Business Meeting, Hotel Sherman

Bryce K. Ozanne, M.D., Moline, President

Election of Officers

DINNER, Hotel Sherman

Speaker: Bernard K. Galston, M.D.

Demonstration of Hypnosis

Tuesday, May 13

CLINICAL DEMONSTRATIONS

St. Luke's, Presbyterian,

Illinois R. and E., Michael Reese, and

Wesley Memorial Hospitals

SCIENTIFIC SESSION, Regency Room, Hotel Sherman

Lewis C. Hitchner, M.D., President-Elect

“Care of the Patient During Mitral Commissurotomy,”

John W. Pender, M.D., Rochester, Minn.

“Proteins in Relation to Surgery and Anesthesia,”

Gordon McNeil, M.D., Chicago.

Title to be Announced

Jacob J. Jacoby, M.D., Columbus, Ohio.
